# Supplementary material
Source: ML conference proceedings conference paper supplement (https://openaccess.thecvf.com/content/CVPR_2019/html/Xiang_Monocular_Total_Capture_CVPR_2019_paper.html)
Supplement: Supplementary file 1 [file Xiang_Monocular_Total_Capture_CVPR_2019_supplemental.pdf]

# Monocular Total Capture: Posing Face, Body, and Hands in the Wild (Supplementary Material)

Donglai Xiang<sup>1</sup> Hanbyul Joo<sup>1,2</sup> Yaser Sheikh<sup>1</sup>  
<sup>1</sup>Carnegie Mellon University <sup>2</sup>Facebook AI Research  
 {donglaix, hanbyulj, yaser}@cs.cmu.edu

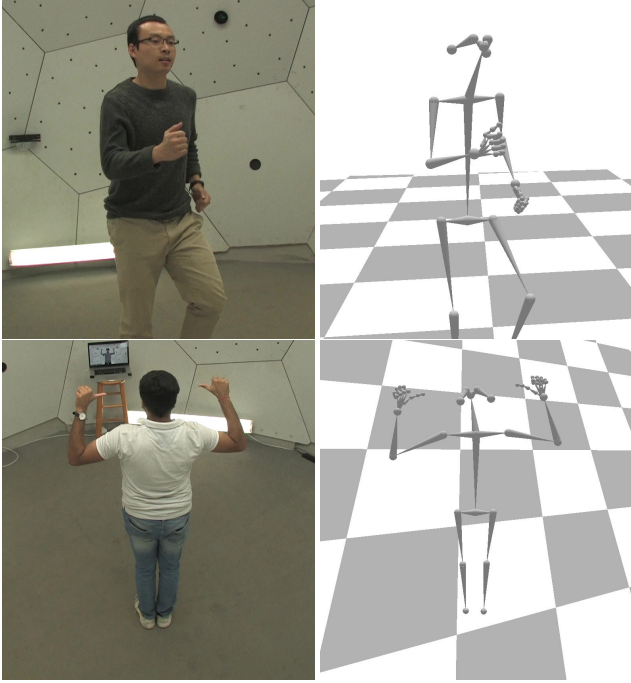

Figure 1. Example images and 3D annotations from our new 3D human pose dataset.

## 1. New 3D Human Pose Dataset

In this section, we provide more details of the new 3D human pose dataset that we collect.

### 1.1. Methodology

We build this dataset in 3 steps:

- We randomly recruit 40 volunteers on campus and capture their motion in a multi-view system [1, 2]. During the capture, all subjects follow the motion in the same video of around 2.5 minutes recorded in advance.
- We use multi-view 3D reconstruction algorithms [1, 2, 4] to reconstruct 3D body, hand and face keypoints.

- We run filters on the reconstruction results. We compute the average lengths of all bones for every subject, and discard a frame if the difference between the length of any bone in the frame and the average length is above a certain threshold. We further manually verify the correctness of hand annotations by projecting the skeletons onto 3 camera views and checking the alignment between the projection and images.

### 1.2. Statistics and Examples

To train our networks, we use our captured 3D body data and hand data, including a total of **834K** image-annotation pairs for human body and **111K** pairs for hands. Example data are shown in Fig. 1 and our supplementary video.

## 2. Network Skeleton Definition

In this section we specify the skeleton hierarchy  $\mathbb{S}$  we use for our Part Orientation Fields and joint confidence maps. As shown in Fig. 2, we predict 18 keypoints for the body and POFs for 17 body parts, so  $\mathbf{S}^B \in \mathbb{R}^{18 \times 368 \times 368}$ ,  $\mathbf{L}^B \in \mathbb{R}^{51 \times 368 \times 368}$ . Analogously, we predict 21 joints for each hand and POFs for 20 hand parts, so  $\mathbf{S}^{LH}$  and  $\mathbf{S}^{RH}$  have the dimension  $21 \times 368 \times 368$ , while  $\mathbf{L}^{LH}$  and  $\mathbf{L}^{RH}$  have the dimension  $60 \times 368 \times 368$ . Note that we train a CNN only for left hands, and we horizontally flip images of right hands before they are fed into the network during testing. Some example outputs of our CNN are shown in Fig. 4, 5, 6, 7.

## 3. Deformable Human Model

### 3.1. Model Parameters

As explained in the main paper, we use Adam model introduced in [3] for total body motion capture. The model parameters  $\Psi$  include the shape parameters  $\phi \in \mathbb{R}^{K_\phi}$ , where  $K_\phi = 30$  is the dimension of shape deformation space, the pose parameters  $\theta \in \mathbb{R}^{J \times 3}$  where the  $J = 62$  is the number of joints in the model<sup>1</sup>, the global transla-

<sup>1</sup>The model has 22 body joints and 20 joints for each hand.



- [3] Hanbyul Joo, Tomas Simon, and Yaser Sheikh. Total capture: A 3d deformation model for tracking faces, hands, and bodies. In *CVPR*, 2018.
- [4] Tomas Simon, Hanbyul Joo, Iain Matthews, and Yaser Sheikh. Hand keypoint detection in single images using multiview bootstrapping. In *CVPR*, 2017.

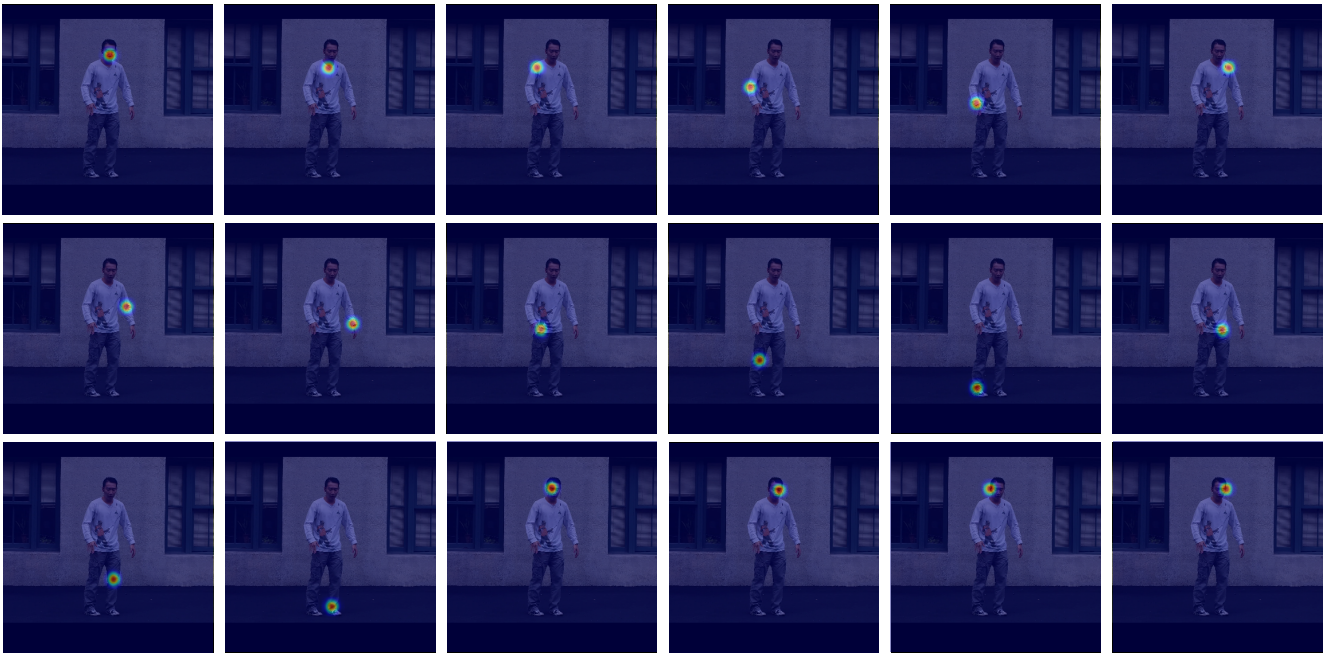

Figure 4. Joint confidence maps predicted by our CNN for a body image.

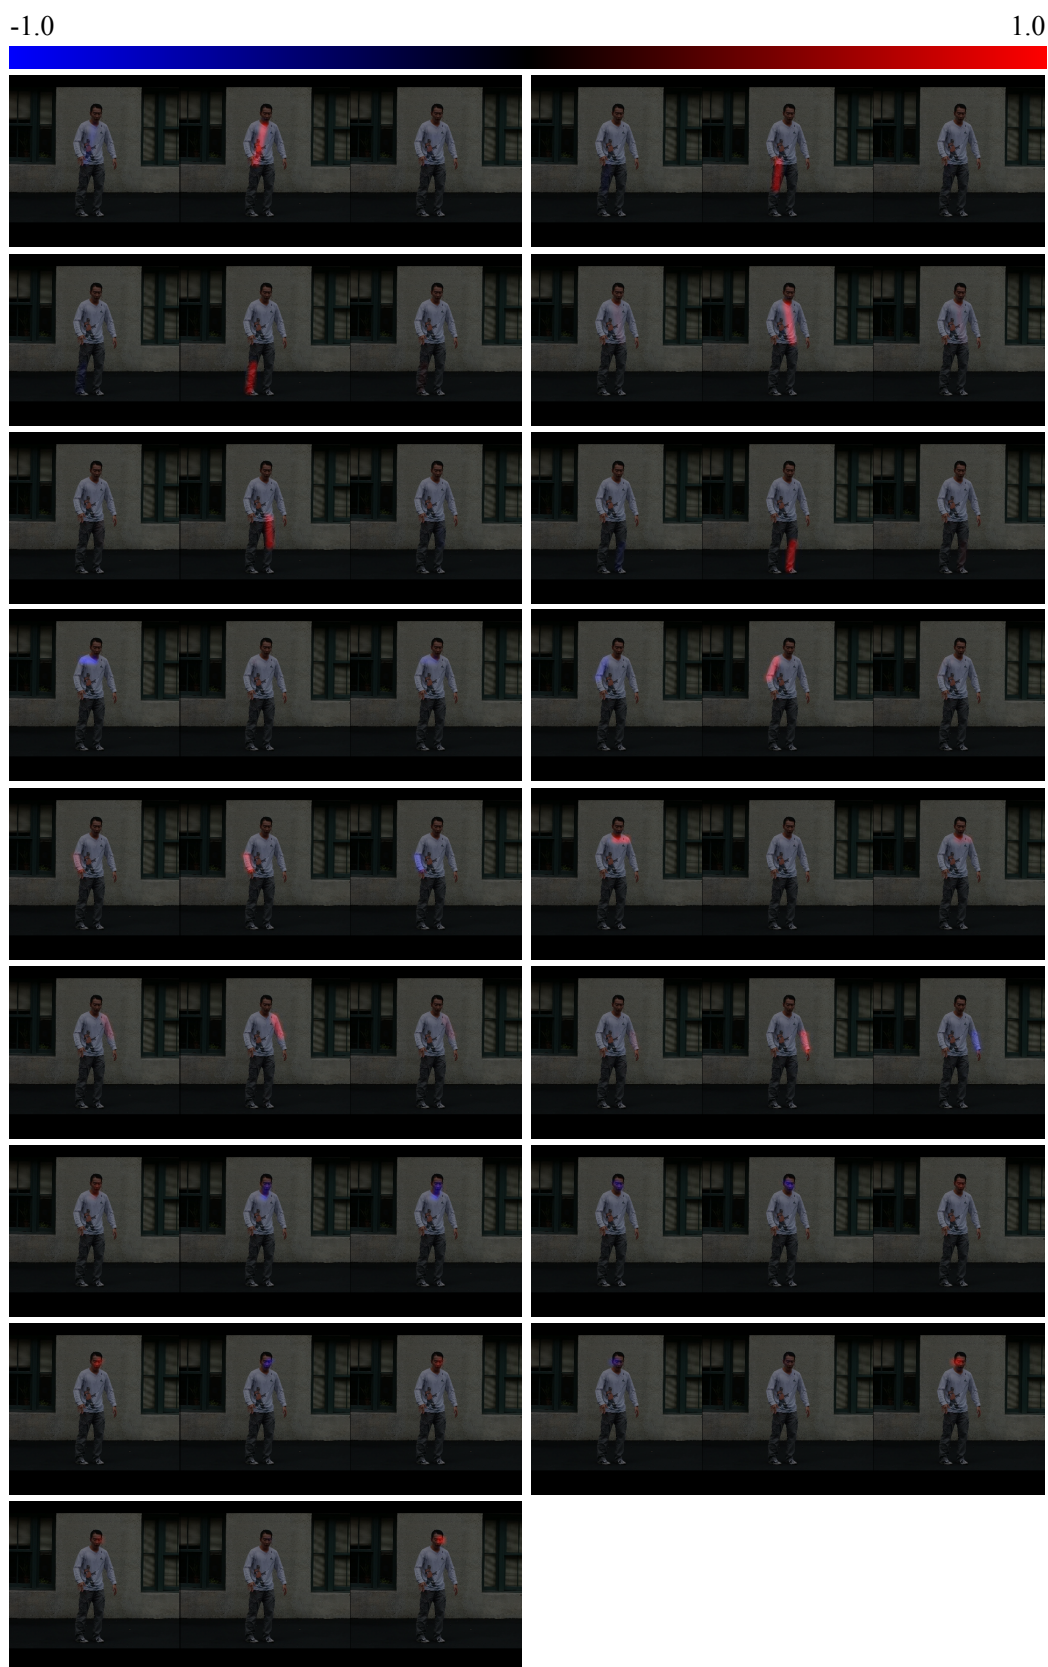

Figure 5. Part Orientation Fields predicted by our CNN for a body image. For each body part we visualize  $x$ ,  $y$ ,  $z$  channels separately.

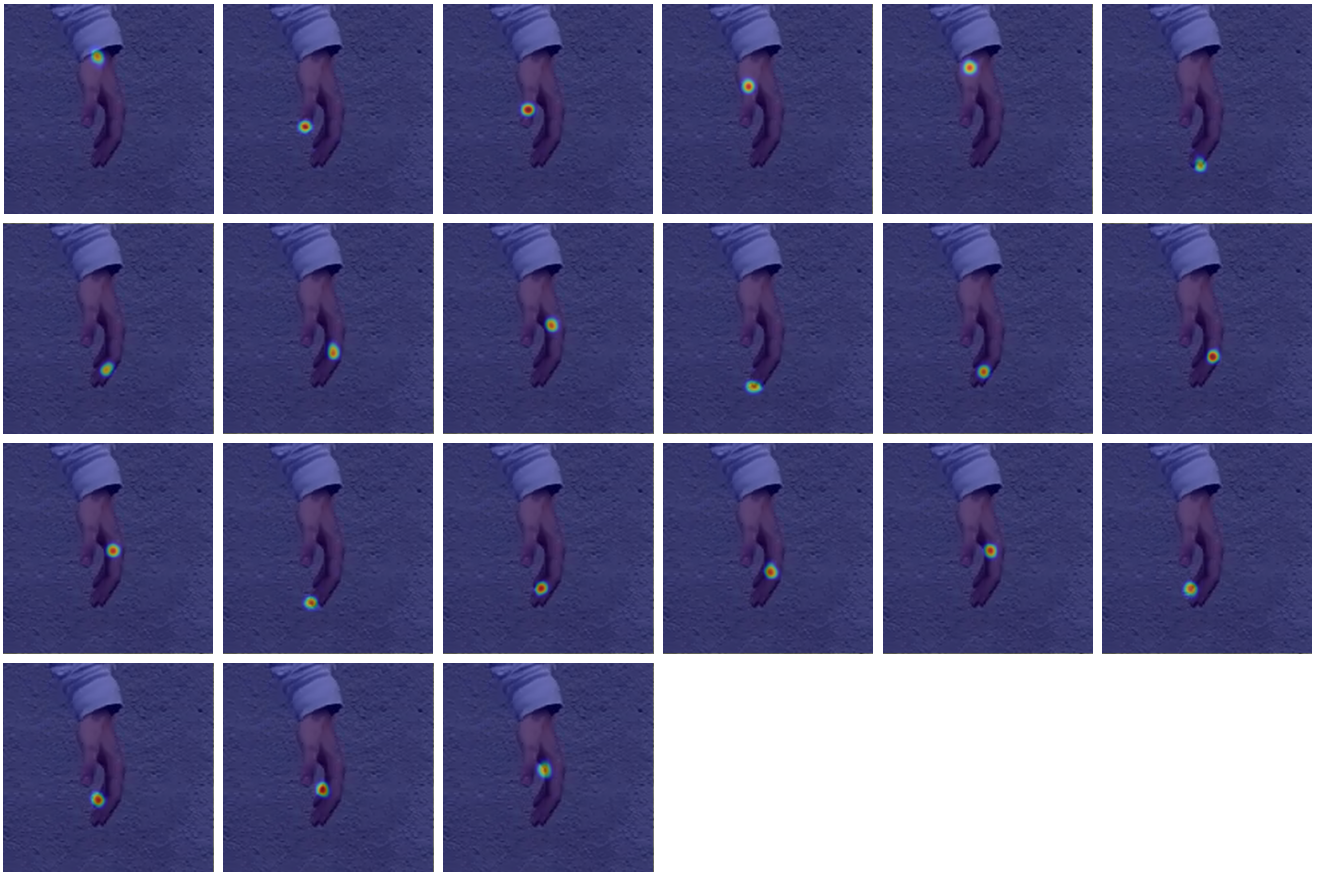

Figure 6. Joint confidence maps predicted by our CNN for a hand image.

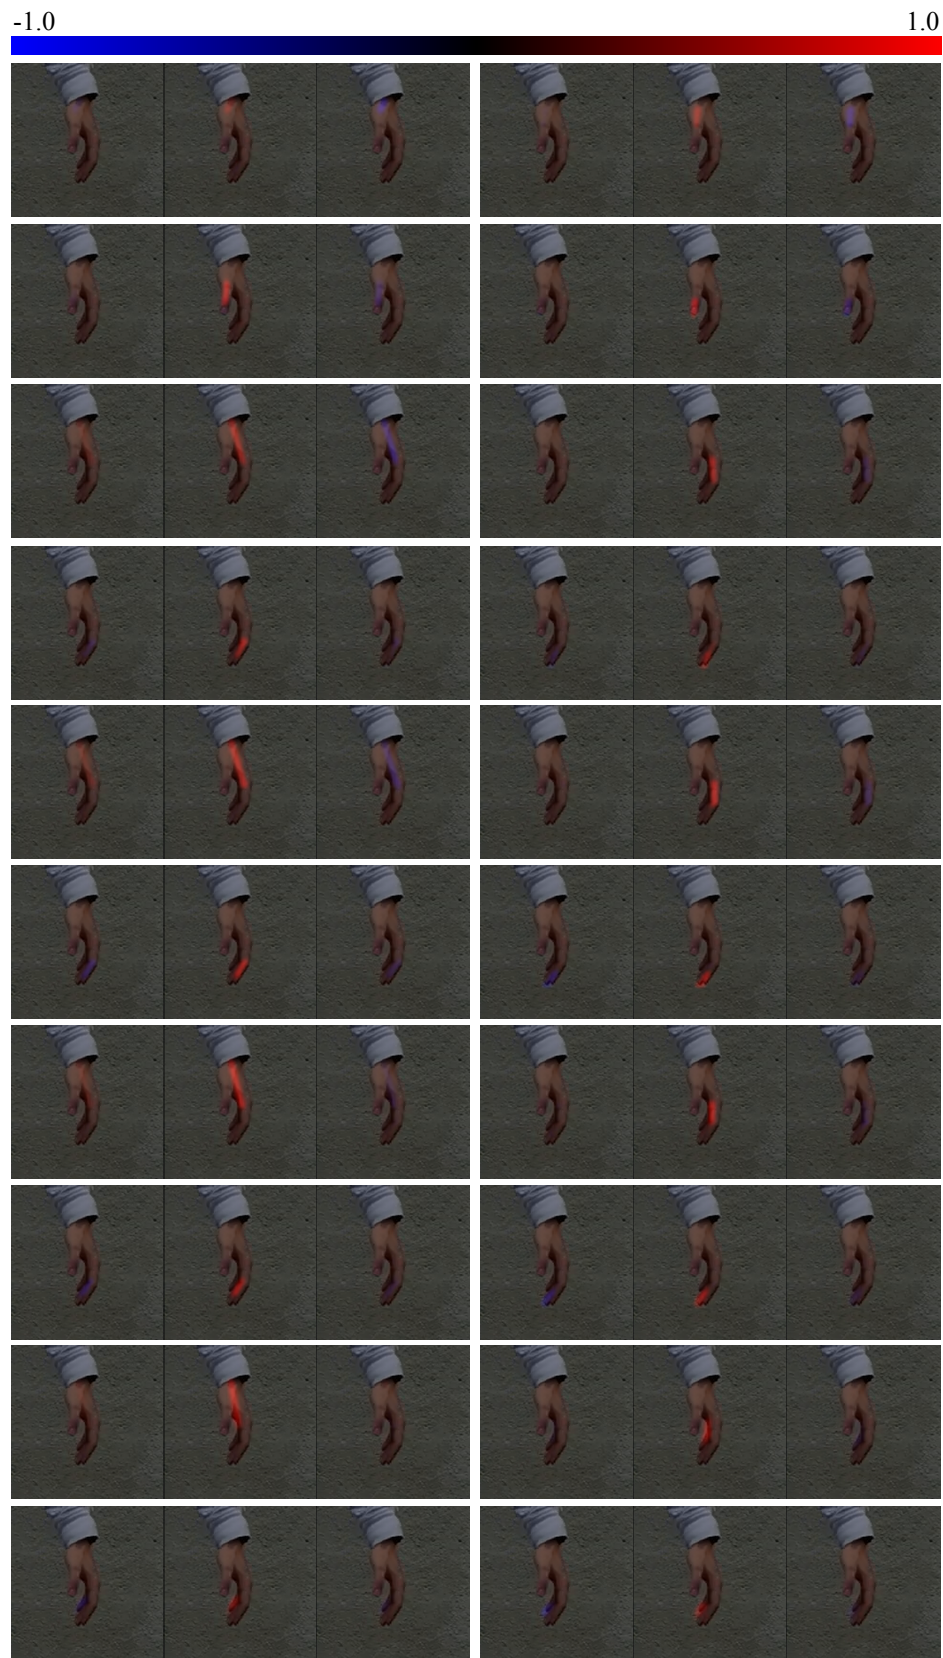

Figure 7. Part Orientation Fields predicted by our CNN for a hand image. For each hand part we visualize  $x$ ,  $y$ ,  $z$  channels separately.
